# Supplementary material
Source: Springer Nature journal article supplement (https://www.springermedizin.de/resource/supplementary/13033_2010_82_MOESM2_ESM.pdf/9651786)

## Quality of Life (WHOQoL-BREF)

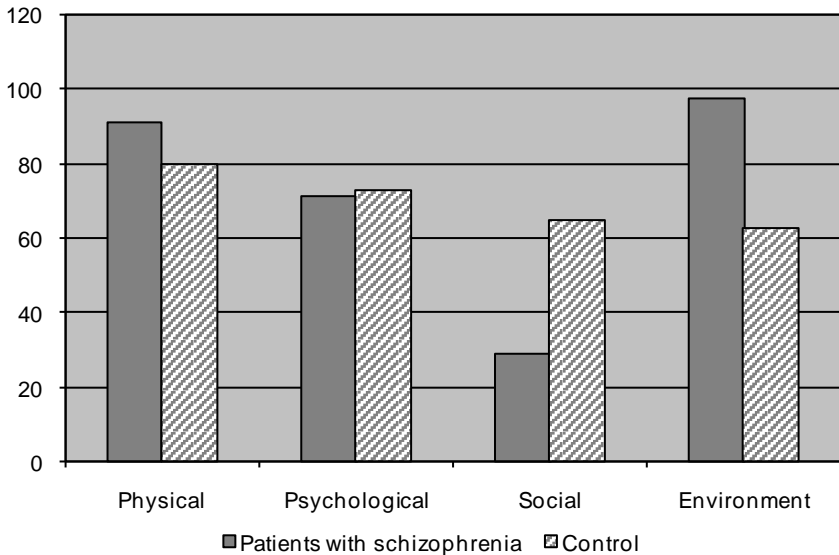

Supplement: MOESM2 [file 9651786]
